# Supplementary material for: PAH/DAS covalently cross-linked layer-by-layer multilayers: a “nano-net” superstratum immobilizes nanoparticles and remains permeable to small molecules
Source: Royal Society of Chemistry journal article supplement (doi:10.1039/c5sm01647a), 2015-01-01
Supplement: c5sm01647a1.pdf [file c5sm01647a1.pdf]

# PAH/DAS covalently cross-linked Layer-by-Layer multilayers: a “nano-net” superstratum immobilizes nanoparticles and remains permeable to small molecules

Qi An<sup>\*a</sup>, Kun Nie<sup>a</sup>, Yihe Zhang<sup>\*a</sup>, Yue Wang<sup>b</sup>, Yingmo Hu<sup>\*a</sup>, Victoria Dutschk<sup>c</sup>,

Xinglong Luan<sup>a</sup>

a. Beijing Key Laboratory of Materials Utilization of Nonmetallic Minerals and Solid Wastes, National Laboratory of Mineral Materials, School of Materials Science and Technology, China University of Geosciences, Beijing, 100083.

E-mail: an@cugb.edu.cn; zyh@cugb.edu.cn; huyingmo@cugb.edu.cn

b. Beijing Engineering Research Center for the Synthesis and Applications of Waterborne Polymers, Beijing University of Chemical Technology, Beijing 100029, PR China.

c. Engineering of Fibrous Smart Materials (EFSM), Faculty of Engineering Technology (CTW), University of Twente, P.O. Box 217, 7500AE Enschede, The Netherlands

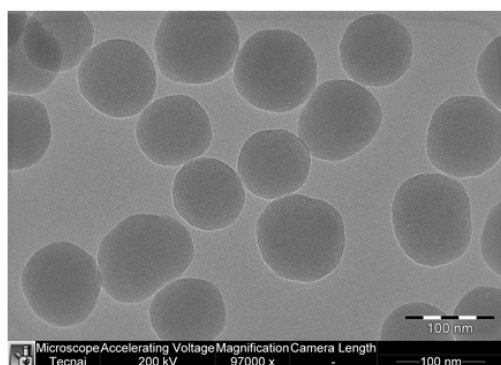

Figure S 1. TEM images of synthesized silica nanoparticles.

**Table S1.** Residual ratio of the multilayered films after treatment in basic solutions (pH 14) for different period of time. \*Uncross-linked: (SiO<sub>2</sub> NP/PAH)<sub>5</sub> films. \*\*Cross-linked: (SiO<sub>2</sub> NP/PAH)<sub>5</sub> films post-infiltrated by DAS followed by cross-linking.

|                 | Immersion for 30min | Immersion for 4h |
|-----------------|---------------------|------------------|
| Uncross-linked* | 93.7%               | 61.1%            |
| Cross-linked**  | 80.7%               | 46.3%            |

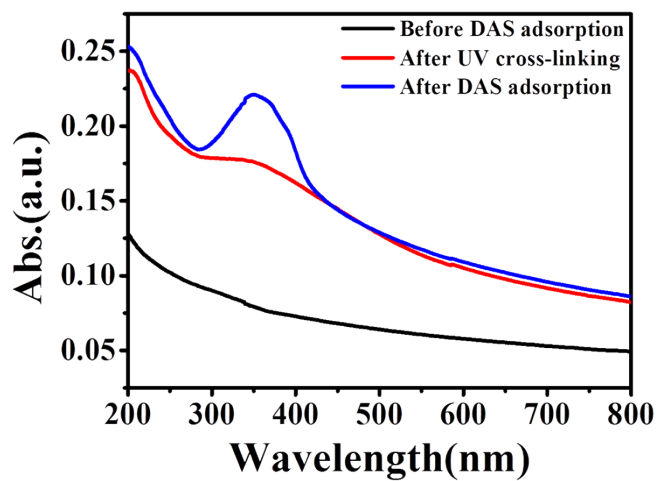

Figure S 2. UV-vis spectra for the  $(\text{PAH}/\text{SiO}_2\text{NP})_5$  multilayers (black), and the films after infiltrated by DAS (red), and after UV light-induced decomposition of DAS.

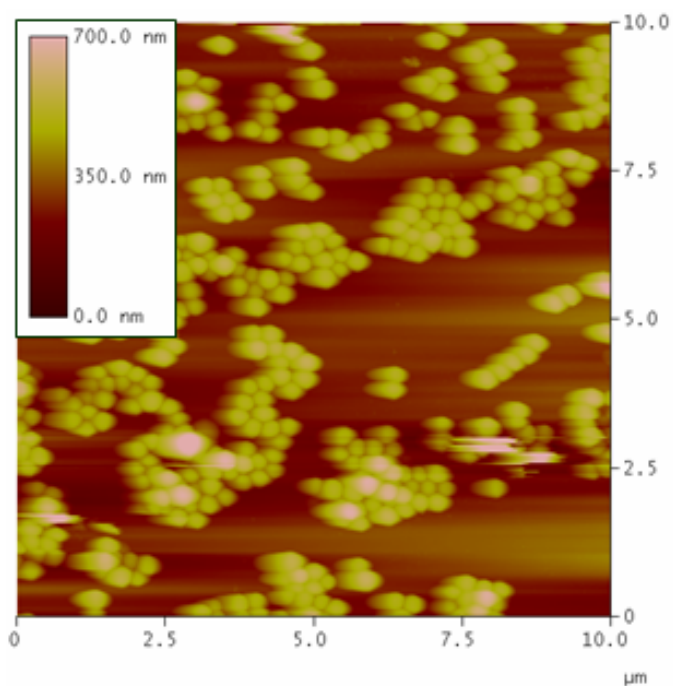

Figure S 3. AFM image of the surface morphology of  $(\text{PAH}/\text{SiO}_2\text{NP})_5$  multilayers.

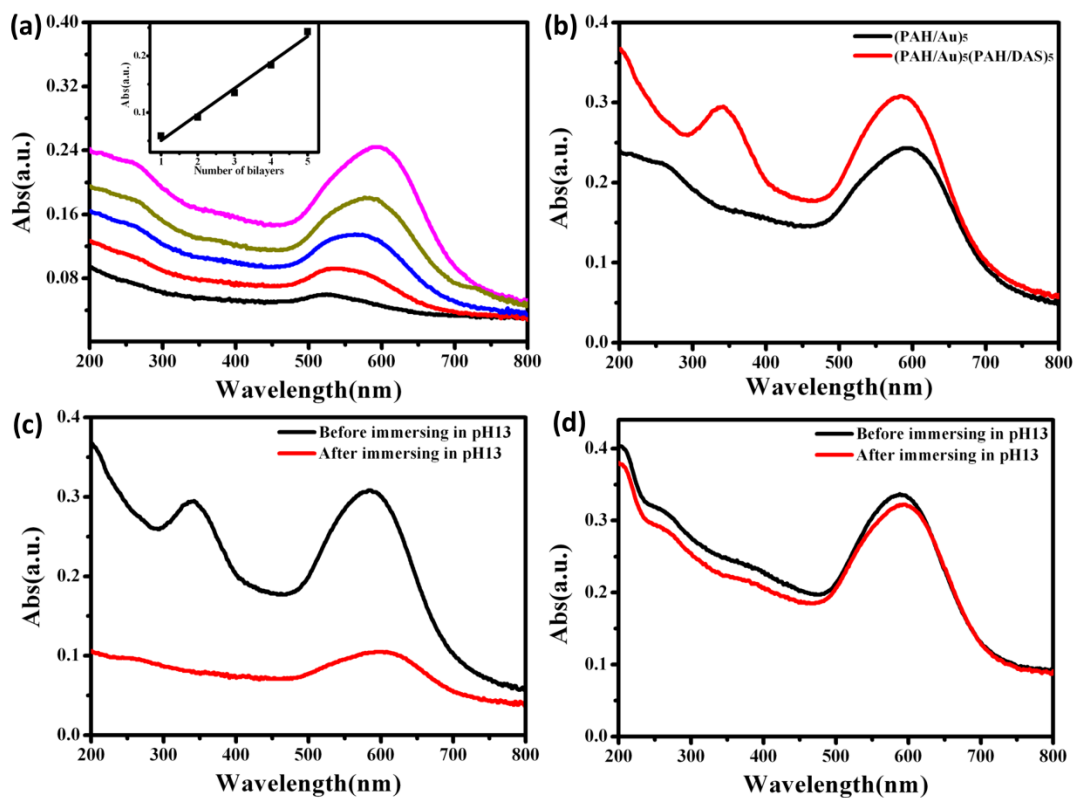

Figure S 4. (a) UV-vis spectra following the assembly process of the  $(\text{PAH}/\text{Au})_5$  LbL films. The inset indicates linear relationship between the absorbance of the film and the number of bilayers. (b) UV-vis spectra of the  $(\text{PAH}/\text{Au})_5$  LbL films (black) and the  $(\text{PAH}/\text{Au})_5(\text{PAH}/\text{DAS})_5$  LbL films (red). (c) UV-vis spectra of the UNCROSS-LINKED  $(\text{PAH}/\text{Au})_5(\text{PAH}/\text{DAS})_5$  LbL film before (black) and after (red) immersion in the basic solution. (d) UV-vis spectra of the CROSS-LINKED  $(\text{PAH}/\text{Au})_5(\text{PAH}/\text{DAS})_5$  LbL film before (black) and after (red) immersion in the basic solution.

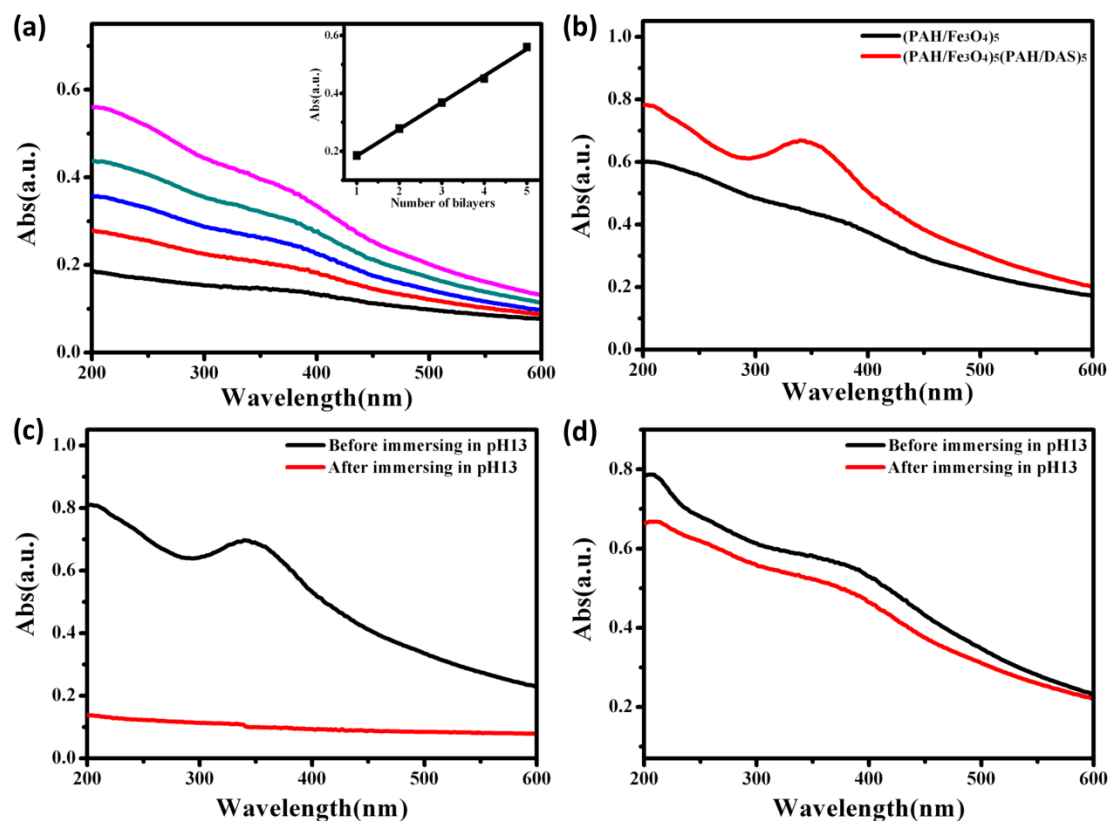

Figure S 5. (a) UV-vis spectra following the assembly process of the (PAH/Fe<sub>3</sub>O<sub>4</sub>)<sub>5</sub> LbL films. The inset indicates linear relationship between the absorbance of the film and the number of bilayers. (b) UV-vis spectra of the (PAH/Fe<sub>3</sub>O<sub>4</sub>)<sub>5</sub> LbL films (black) and the (PAH/Fe<sub>3</sub>O<sub>4</sub>)<sub>5</sub>(PAH/DAS)<sub>5</sub> LbL films (red). (c) UV-vis spectra of the UNLINKED (PAH/Fe<sub>3</sub>O<sub>4</sub>)<sub>5</sub>(PAH/DAS)<sub>5</sub> LbL film before (black) and after (red) immersion in the basic solution. (d) UV-vis spectra of the LINKED (PAH/Fe<sub>3</sub>O<sub>4</sub>)<sub>5</sub>(PAH/DAS)<sub>5</sub> LbL film before (black) and after (red) immersion in the basic solution.

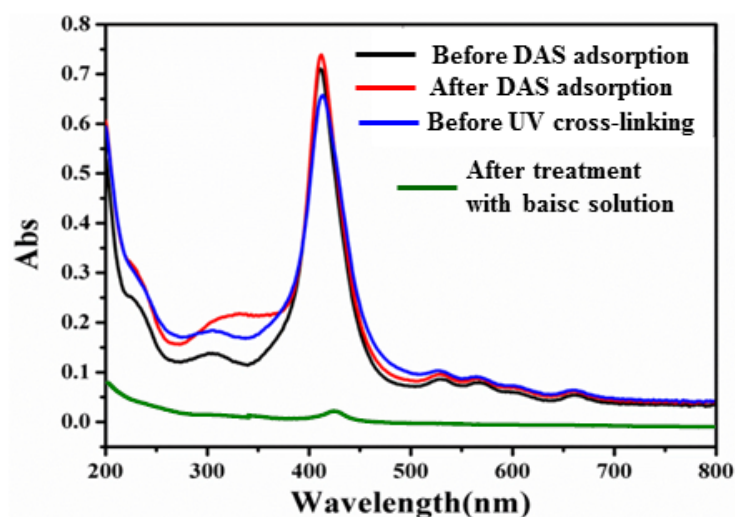

Figure S 6. UV-vis spectra for the (PAH/Por)<sub>5</sub> multilayers (black), and the films after infiltrated by DAS (red), and after UV light-induced decomposition of DAS, and after treatment using the basic solution (green).

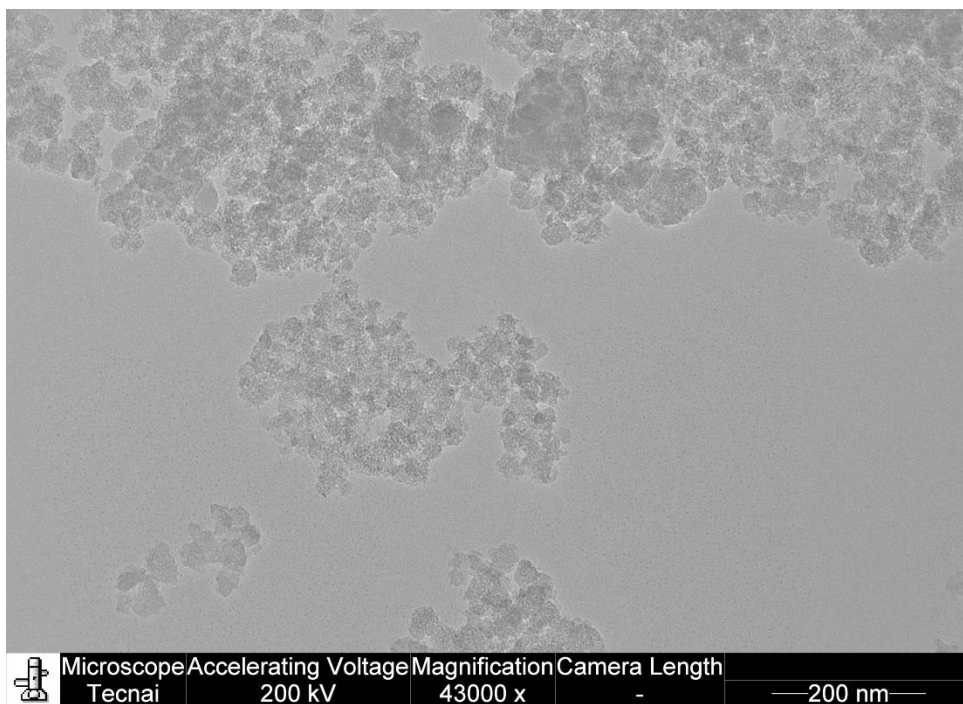

Figure S 7. TEM images of the prepared mesoporous silica nanoparticles.

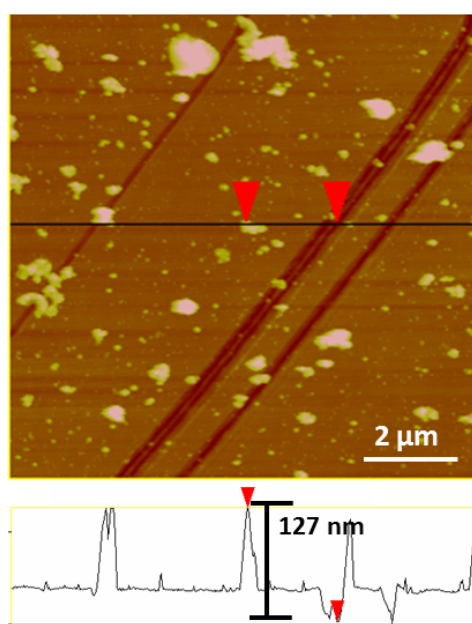

Figure S8. AFM image of the surface morphologies of cross-linked  $(\text{MP SiO}_2 \text{ NP/PAH})_5(\text{PAH/DAS})_5$  multilayers.

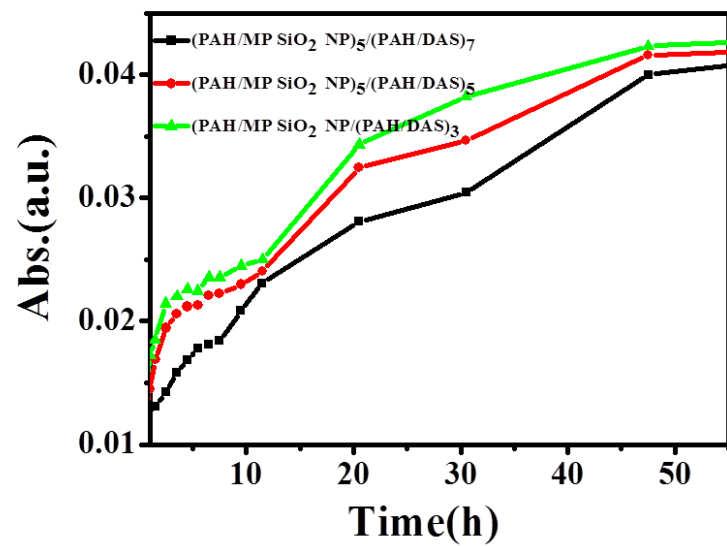

Figure S 9. Release profile of MB from (MP SiO<sub>2</sub> NP/PAH)<sub>5</sub>(PAH/DAS)<sub>n</sub> (n=3,5,7).
